# Supplementary material
Source: PubMed Central journal article supplement (PMC4136039)
Supplement: AAC.02745-14_zac008143096so1.pdf [file AAC.02745-14_zac008143096so1.pdf]

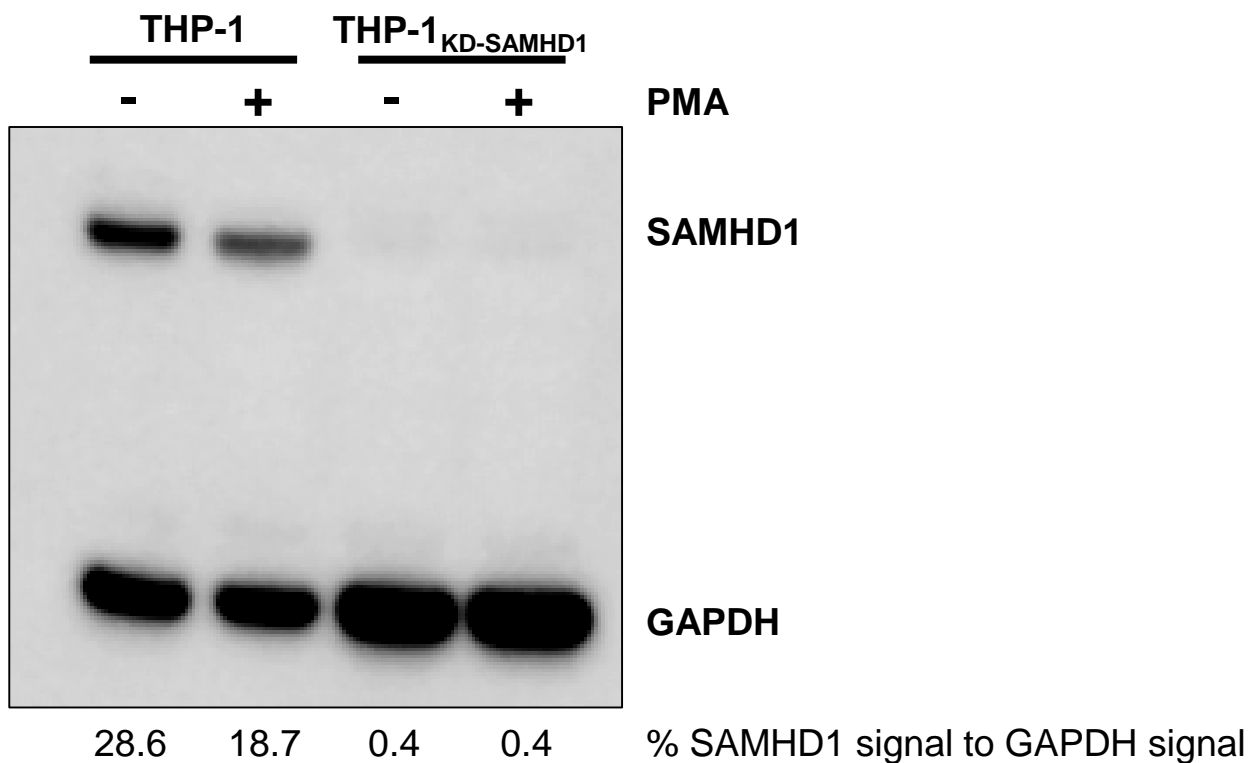

**Figure S1.** Knockdown efficiency of SAMHD1 in THP-1<sub>KD-SAMHD1</sub> cells.

2 X 10<sup>5</sup> cells were differentiated for 24h with 33 ng/ml PMA and analyzed for SAMHD1 expression on an immunoblot using anti-SAMHD1 monoclonal antibody (Origene) and secondary anti-mouse HRP (Sigma). Bands were visualized and quantified on a Li-cor phosphorimager. The SAMHD1 to GAPDH ratio was determined as 100 X (SAMHD1 signal) / (GAPDH signal).
